# Supplementary material for: Vacuolar Proton Pyrophosphatase Is Required for High Magnesium Tolerance in Arabidopsis
Source: MDPI journal article supplement (doi:10.3390/ijms19113617), 2018-11-16
Supplement: s1 [file s1]

**Figure S1. Molecular identification of *avp1-4* mutant.** (a) Schematic diagram of T-DNA insertion in *avp1-4*. (b) PCR analysis to identify homozygous *avp1* knockout mutant. (c) RT-PCR analysis of *AVP1* gene expression in Col-0 and *avp1-4* knockout mutant. Expression of *ACTIN2* was analyzed as internal controls. (d)  $H^+$ -PPase hydrolytic activity of *avp1-4*. Results are shown as percentage of the Col-0 control activity. Values are mean  $\pm$  SD of three replicate experiments. (e) Growth phenotype of *avp1-4*. Wild-type (Col-0) and *avp1-4* plants were transplanted to soil and grew under 12-h light/12-h dark cycles and pictures were taken 4-week and 7-week after transfer.

**Figure S1.** Molecular identification of *avp1-4* mutant. (a) Schematic diagram of T-DNA insertion in *avp1-4*. (b) PCR analysis to identify homozygous *avp1* knockout mutant. (c) RT-PCR analysis of *AVP1* gene expression in Col-0 and *avp1-4* knockout mutant. Expression of *ACTIN2* was analyzed as internal controls. (d) H<sup>+</sup>-PPase hydrolytic activity of *avp1-4*. Results are shown as percentage of the Col-0 control activity. Values are mean  $\pm$  SD of three replicate experiments. (e) Growth phenotype of *avp1-4*. Wild-type (Col-0) and *avp1-4* plants were transplanted to soil and grew under 12-h light/12-h dark cycles and pictures were taken 4-week and 7-week after transfer.

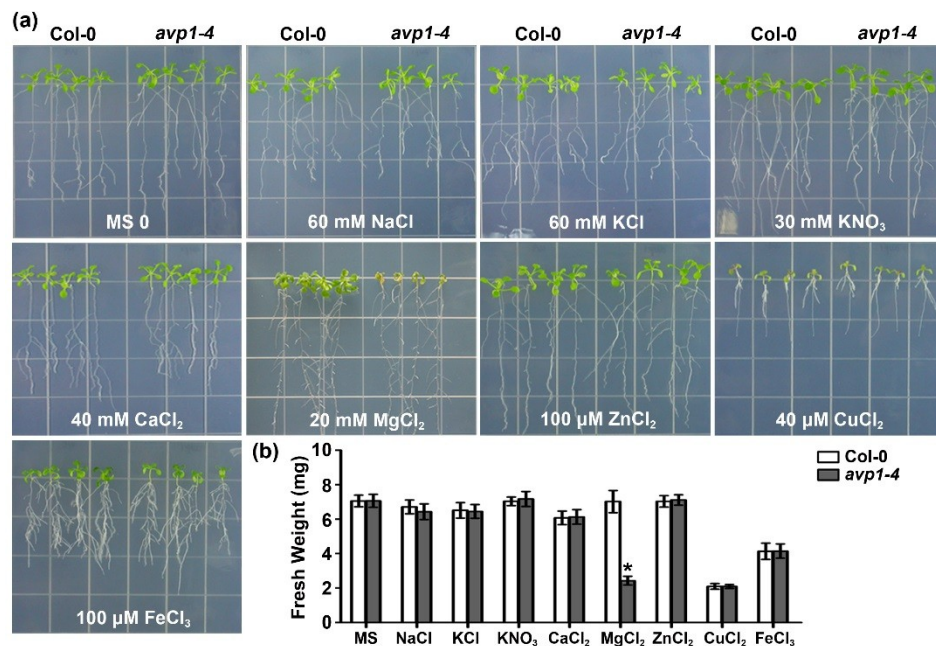

**Figure S2.** The *avp1-4* mutant is specifically sensitive to Mg<sup>2+</sup>. Growth of wild-type Col-0 and *avp1-4* mutant plants under various ionic stress conditions. Five-day old Col-0 and *avp1-4* seedlings were transferred onto MS medium or MS medium supplemented with 60 mM NaCl, 60 mM KCl, 30 mM KNO<sub>3</sub>, 40 mM CaCl<sub>2</sub>, 20 mM MgCl<sub>2</sub>, 100 μM ZnCl<sub>2</sub>, 40 μM CuCl<sub>2</sub> or 100 μM FeCl<sub>3</sub>, respectively. Pictures were taken on the 7th day after transfer. (b) Fresh weight of seedlings on the 7th day after transfer. Data are presented as mean ± SD of four replicate experiments. Asterisks indicate statistically significant differences compared with the Col-0 (Student's *t*-test, \**P*<0.05).

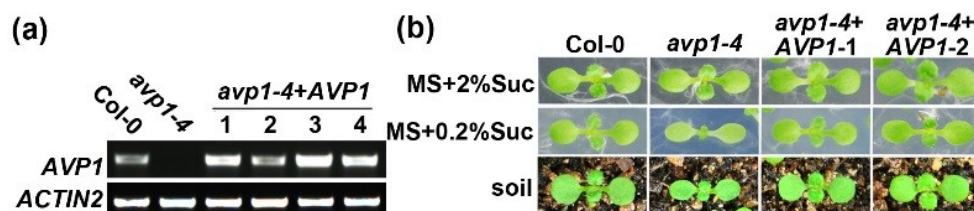

**Figure S3.** Functional complementation of *avp1-4*. (a) RT-PCR analysis of AVP1 expression in Col-0, *avp1-4* and four randomly selected AVP1 complimentary

lines. (b) Morphological phenotypes of *avp1-4* mutant on different growth media. Col-0 and *avp1-4* mutant seedlings were grown for 8 days either on soil (bottom panel) or standard MS medium supplemented with 2% or 0.2% sucrose (top and middle panels).

**Table S1.** Primers Used in This Study.

| Purpose                                           | Name     | Primer sequence (5' to 3') |
|---------------------------------------------------|----------|----------------------------|
| <i>avp1-4</i> mutant<br>identification and RT-PCR | LP-AVP1  | ACGACACCACCAGAACCTGCAAG    |
|                                                   | RP-AVP1  | ATGAGCAATGGGTAGCACATGGC    |
| <i>mgt6</i> mutant<br>identification              | LP-MGT6  | ACTGGATGGAATGCGGAACAAG     |
|                                                   | RP-MGT6  | CCAAATCAAATCAACCCATAAAC    |
| T-DNA left<br>border primers                      | GKL      | ATATTGACCATCATACTCATTGC    |
|                                                   | LBa1     | TGGTTCACGTAGTGGGCCATCG     |
| <i>MGT6</i><br>RT-PCR                             | MGT6RT-F | ACTGGATGGAATGCGGAACAAG     |
|                                                   | MGT6RT-R | GGCGTAACCAAGAGTGACCATGA    |
| <i>CBL2</i><br>RT-PCR                             | CBL2RT-F | GCTCGTGCTCTCTCCGTCTTTC     |
|                                                   | CBL2RT-R | GCCGCTGCTTGCTTTTGCTTTTG    |
| <i>CBL3</i><br>RT-PCR                             | CBL3RT-F | CTGAGTCCGGCATGAACCTGTC     |
|                                                   | CBL3RT-R | TTCCCAAATTGTCTCCTCTGCTAA   |
| <i>ACTIN2</i><br>RT-PCR                           | ACT2RT-F | GGAAGGATCTGTACGGTAAC       |
|                                                   | ACT2RT-R | GGACCTGCCTCATCATACT        |
